# Supplementary material for: Proteomic Analyses Detect Higher Expression of C-Type Lectins in Imidacloprid-Resistant Colorado Potato Beetle Leptinotarsa decemlineata Say
Source: MDPI journal article supplement (doi:10.3390/insects12010003), 2020-12-23
Supplement: s1 [file s1]

# Proteomic Analyses Detect Higher Expression of C-Type Lectins in Imidacloprid-Resistant Colorado Potato Beetle *Leptinotarsa decemlineata* Say

Ian M. Scott <sup>1,\*</sup>, Gabrielle Hatten <sup>1</sup>, Yazel Tuncer <sup>1</sup>, Victoria C. Clarke <sup>2</sup>, Kristina Jurcic <sup>2</sup> and Ken K.-C. Yeung <sup>2</sup>

<sup>1</sup> London Research and Development Centre, Agriculture and Agri-Food Canada, London, ON N5V 4T3, Canada; ghatten@uwo.ca (G.H.); ytuncer@uwo.ca (Y.T.)

<sup>2</sup> London Regional Proteomics Centre, Biochemistry, Western University, London, ON N6A 5C1, Canada; vwraw@uwo.ca (V.C.C.); kjurcic@uwo.ca (K.J.); kyeung@uwo.ca (K.K.-C.Y.)

\* Correspondence: ian.scott2@canada.ca

## Supplementary Material

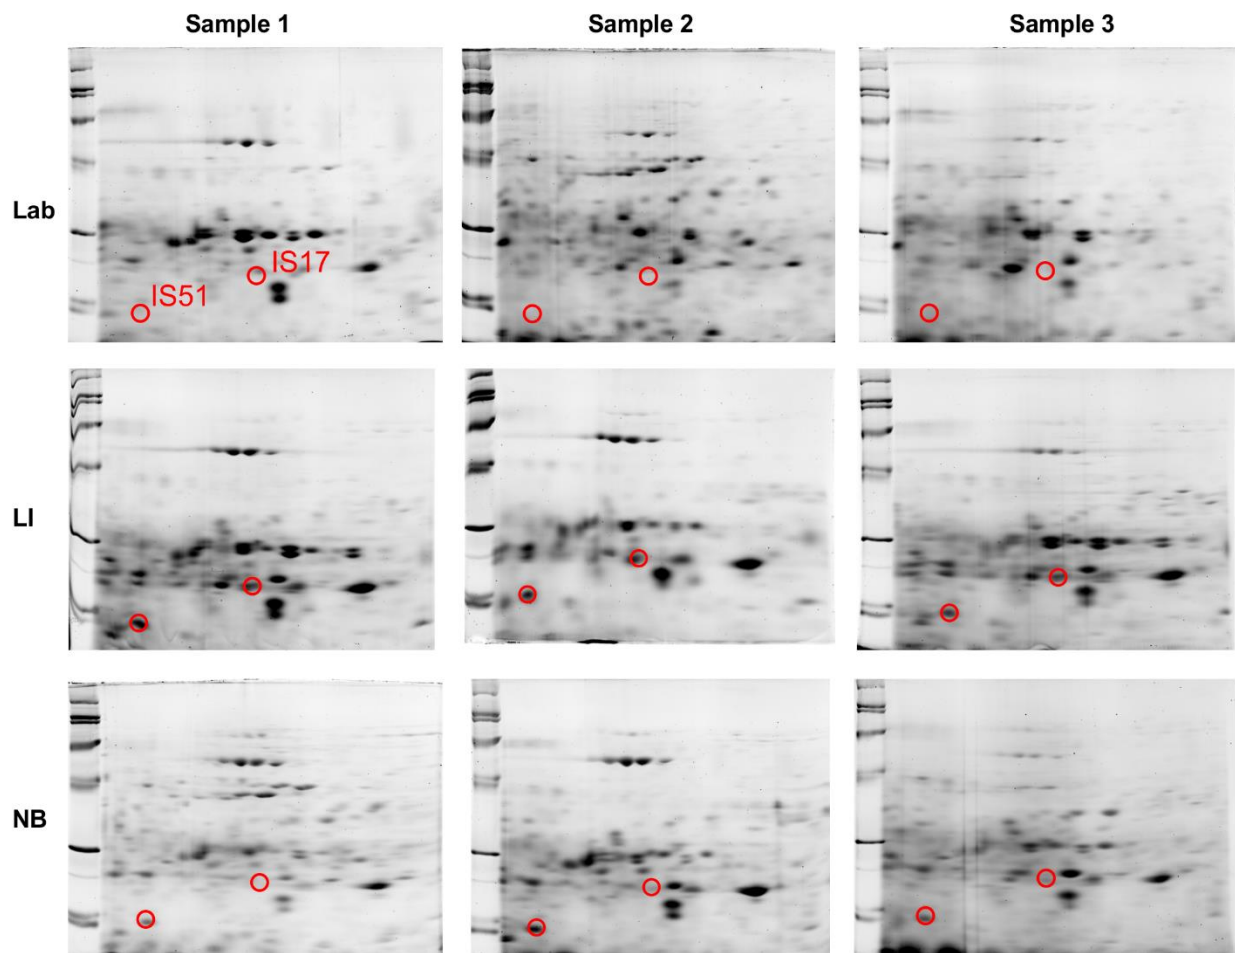

**Figure S1.** 2-D PAGE midgut samples from untreated Lab, LI and NB CPB strains. Strips 18 cm in length were run at pH 4-7 and cut to 7cm.

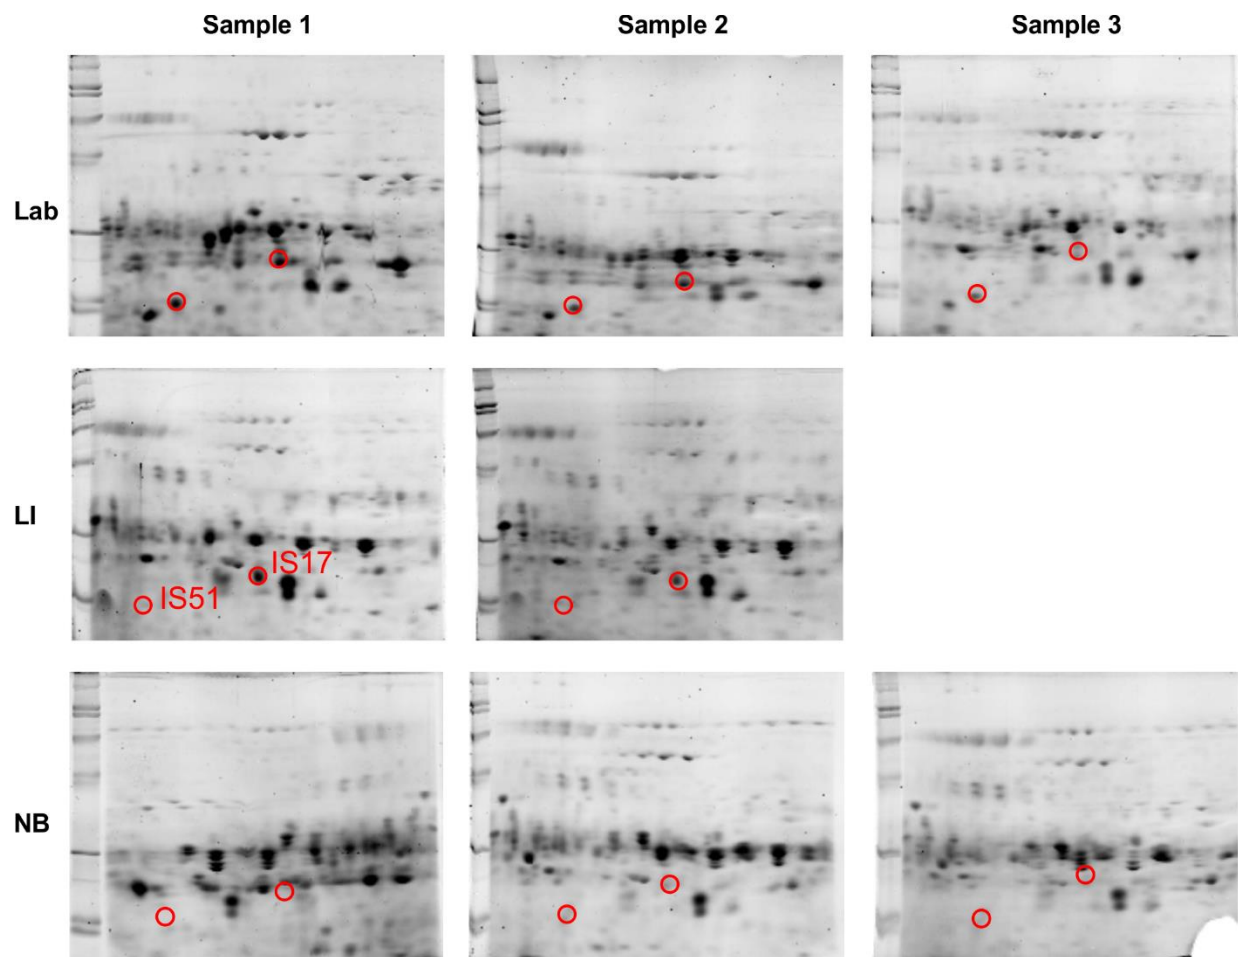

**Figure S2.** 2-D PAGE midgut samples from imidacloprid-treated Lab, LI and NB CPB strains. Strips 18 cm in length were run at pH 4-7 and cut to 7cm.

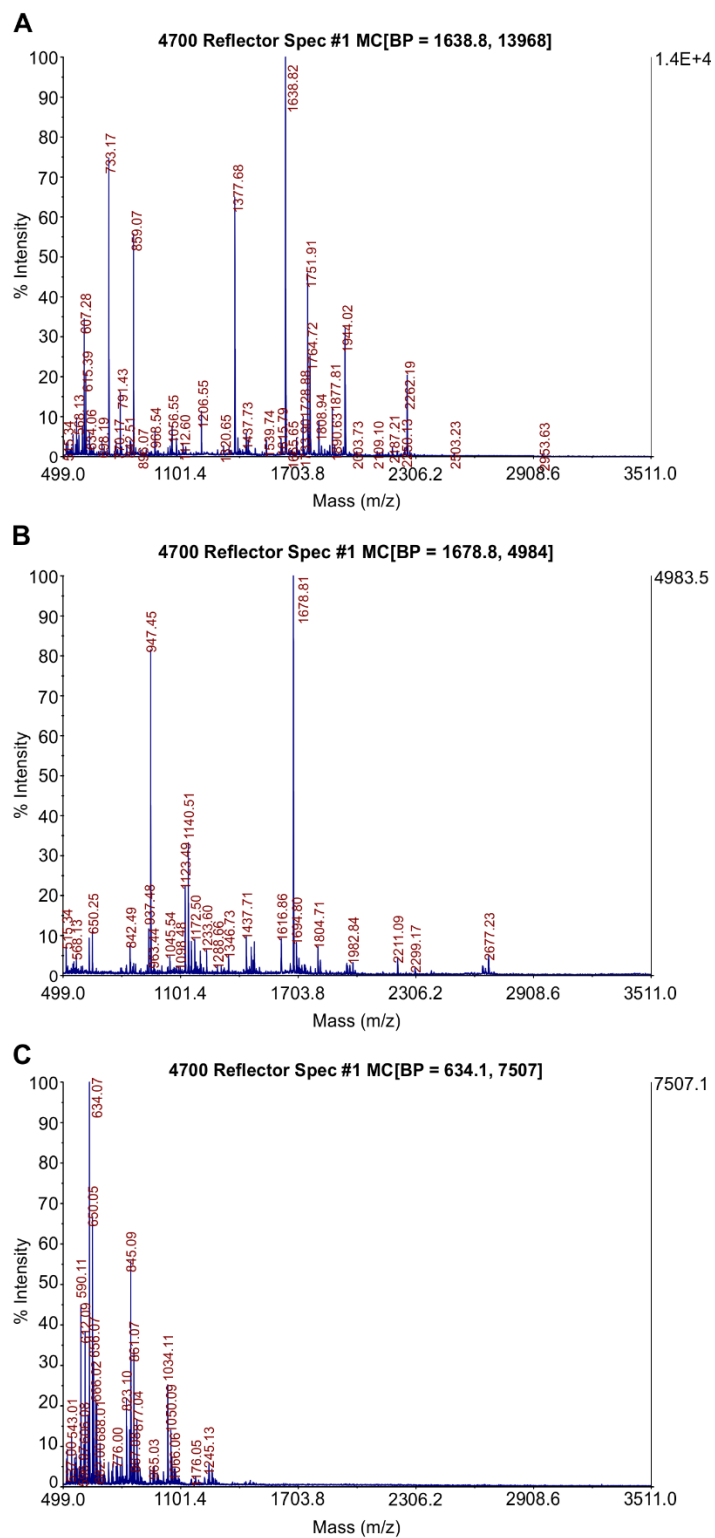

**Figure S3.** MALDI MS fingerprint spectrum for Lab strain (A), LI (B) and NB (C) IS17 spots.

**Table S1.** Summary of best hits for IS17 in Lab, LI and NB strain CPB midgut tissue<sup>1</sup> based on ESI LC-MSMS PEAKS output.

| Sample           | Hit #          | MOWSE score | #Peptides<br>#Match<br>%Match | Percent coverage | Percent TIC | Protein MW (Da)/pI | Accession | Protein name                                                                                                      |
|------------------|----------------|-------------|-------------------------------|------------------|-------------|--------------------|-----------|-------------------------------------------------------------------------------------------------------------------|
| LI<br>(69 peaks) | 1              | 1490000     | 10/14/2010                    | 40.6             | 48          | 19716/5.7          | 6198      | gi 1285030099 ref XP_023027360.1<br>  ladderlectin-like<br>[ <i>L. decemlineata</i> ]                             |
|                  | 2              | 175212      | 12/17/2012                    | 4.8              | 19.6        | 250525/5.2         | 8461      | gi 1285025224 ref XP_023024904.1<br>  dynein beta chain, ciliary-like [ <i>L. decemlineata</i> ]                  |
|                  | 3              | 37519       | 17/15/22                      | 4.5              | 41.3        | 488975/5.8         | 9002      | gi 1285024081 ref XP_023024309.1<br>  dynein heavy chain 10, axonemal<br>[ <i>L. decemlineata</i> ]               |
| Lab              | 1              | 111000000   | 44/32/36                      | 6.6              | 40.2        | 778404/5.4         | 8376      | gi 1285025405 ref XP_023028950.1<br>  uncharacterized protein<br>LOC111517131, partial [ <i>L. decemlineata</i> ] |
|                  | 2              | 53100000    | 25/22/25                      | 6.5              | 10.1        | 481588/6.0         | 7163      | gi 1285028007 ref XP_023026282.1<br>  cytoplasmic dynein 2 heavy chain<br>1<br>[ <i>L. decemlineata</i> ]         |
|                  | 3              | 144256      | 17/16/18                      | 7                | 9.7         | 287608/8.6         | 11198     | gi 1285019357 ref XP_023021916.1<br>  protein 4.1 homolog isoform X3<br>[ <i>L. decemlineata</i> ]                |
| NB               | 1 <sup>2</sup> |             |                               |                  |             |                    |           |                                                                                                                   |

<sup>1</sup>Digestion type = trypsin for all samples; <sup>2</sup>MS-Fit could not fit the data to any proteins.
